# Supplementary material
Source: MDPI journal article supplement (https://www.mdpi.com/2073-4441/13/24/3535)
Supplement: s1 [file s1]

## Article

# Modelling snowmelt runoff from tropical Andean glaciers under climate change scenarios in the Santa River sub-basin (Peru)

Elmer Calizaya <sup>1,2,\*</sup>, Abel Mejía <sup>1</sup>, Elgar Barboza <sup>3,4</sup>, Fredy Calizaya <sup>1,2</sup>, Fernando Corroto <sup>4,5</sup>, Rolando Salas <sup>4</sup>, Héctor Vásquez <sup>3</sup> and Efrain Turpo <sup>1,4,\*</sup>

<sup>1</sup> Programa de Doctorado en Recursos Hídricos (PDRH), Universidad Nacional Agraria La Molina, Ave. La Molina, S.N., Lima 15012, Peru; jabel@lamolina.edu.pe (A.M.); fcalizaya@unap.edu.pe (F.C.)

<sup>2</sup> Facultad de Ciencias Agrarias, Universidad Nacional del Altiplano de Puno, Puno 21001, Peru

<sup>3</sup> Dirección de Desarrollo Tecnológico Agrario, Instituto Nacional de Innovación Agraria, Ave. La Molina, 1981, Lima 15024, Peru; ebarboza@indes-ces.edu.pe (E.B.); hvasquez@inia.gob.pe (H.V.)

<sup>4</sup> Instituto de Investigación para el Desarrollo Sustentable de Ceja de Selva (INDES-CES), Universidad Nacional Toribio Rodríguez de Mendoza de Amazonas (UNTRM), Chachapoyas 01001, Peru; fcorrotodelafuente@gmail.com (F.C.); rsalas@indes-ces.edu.pe (R.S.)

<sup>5</sup> Departamento de Biología, Área de Botánica, Universidad Autónoma de Madrid, Calle Darwin 2, ES-28049 Madrid, Spain

\* Correspondence: [ecalizaya@unap.edu.pe](mailto:ecalizaya@unap.edu.pe) (E.C.), [eturpo@lamolina.edu.pe](mailto:eturpo@lamolina.edu.pe) (E.T.); Tel.: +51-990-870-560 (E.C.), +51-910-505-165 (E.T.)

**Table S1.** Characteristics of the six elevation zones extracted from the DEM of the Santa river sub-basin.

| Zone | Elevation range (m) | Hypsometric altitude | Área (km <sup>2</sup> ) | Area (%) | Climatological station |
|------|---------------------|----------------------|-------------------------|----------|------------------------|
| A    | 1410–2300           | 2141.87              | 76.31                   | 1.43     | -                      |
| B    | 2300–3200           | 2843.61              | 645.45                  | 12.11    | Yungay                 |
| C    | 3200–4100           | 3730.57              | 1696.76                 | 31.82    | Recuay                 |
| D    | 4100–5000           | 4497.02              | 2446.71                 | 45.89    | Yanamarey              |
| E    | 5000–5900           | 5242.05              | 449.67                  | 8.43     | Artesonraju AP2        |
| F    | 5900–6766           | 6129.92              | 17                      | 0.32     | -                      |

**Table S2.** Snow cover area in km<sup>2</sup> generated with MODIS10A1 sensor imagery every 1 days at GEE.

| Date        | Period in years / Glacier area (km2) |              |              |              |              |              |              |              |              |              |              |              |              |              |              |              |              |              |
|-------------|--------------------------------------|--------------|--------------|--------------|--------------|--------------|--------------|--------------|--------------|--------------|--------------|--------------|--------------|--------------|--------------|--------------|--------------|--------------|
|             | 2000                                 | 2001         | 2002         | 2003         | 2004         | 2005         | 2006         | 2007         | 2008         | 2009         | 2010         | 2011         | 2012         | 2013         | 2014         | 2015         | 2016         | 2017         |
| 1-Jan       |                                      | 196.2        | 299.2        | 81.8         | 158.2        | 210.9        | 442.3        | 139.6        | 95.4         | 204          | 257.1        | 318.9        | 221.5        | 115.5        | 65.8         | 90.5         | 242.8        | 88.8         |
| 9-Jan       |                                      | 315.2        | 151.3        | 217.2        | 277.4        | 237.5        | 217.5        | 157.8        | 231.3        | 231          | 204.5        | 77.5         | 197.9        | 169.7        | 154.5        | 255.4        | 245.5        | 128.6        |
| 17-Jan      |                                      | 390.4        | 115.3        | 184.5        | 296.2        | 331.4        | 141          | 71.6         | 152.8        | 376.9        | 56.5         | 363.4        | 269.4        | 223.4        | 146.4        | 160.2        | 176.3        | 238.2        |
| 25-Jan      |                                      | 149.7        | 60.7         | 110.7        | 148.3        | 236          | 109.9        | 66.4         | 253.4        | 148.4        | 198.8        | 155.9        | 170.5        | 182.1        | 289.5        | 167.6        | 120          | 135.2        |
| 02-feb      |                                      | 260.8        | 229.4        | 75.2         | 76.3         | 179          | 18.8         | 161.8        | 158.1        | 157.7        | 188.1        | 170.1        | 350.1        | 123.3        | 135.9        | 260.9        | 82.8         | 131.9        |
| 10-feb      |                                      | 250          | 136.7        | 299.4        | 132.6        | 202.1        | 292.3        | 180.4        | 96.3         | 213.9        | 103.6        | 398.7        | 422.6        | 159.4        | 120.2        | 190.3        | 129.7        | 162.8        |
| 18-feb      |                                      | 192.4        | 89.1         | 206.3        | 262.2        | 216.3        | 228.5        | 248.7        | 227.9        | 153.1        | 158.8        | 103.9        | 123.6        | 112.2        | 92.6         | 284.8        |              | 193.6        |
| 26-feb      | 649                                  | 348.6        | 233.2        | 254.5        | 157.1        | 131.4        | 78.6         | 87.5         | 276          | 127.6        | 211.5        | 145.3        | 218.4        | 94.6         | 267.8        | 215.1        | 235.7        | 311.6        |
| 06-mar      | 551.8                                | 184.5        | 232.9        | 92.7         | 51.8         | 165.6        | 46.2         | 112.4        | 406.9        | 143.5        | 44.4         | 322.7        | 170          | 154.8        | 212.2        | 141.7        | 150.6        | 137.1        |
| 14-mar      | 321.5                                | 112.5        | 114.5        | 517.5        | 46.4         | 176          | 195          | 316.8        | 314.8        | 151.9        | 86.8         | 349.3        | 131.2        | 102.7        | 160.1        | 75.6         | 129.1        | 244.1        |
| 22-mar      | 527.9                                | 281.9        | 226          | 105.6        | 81.7         | 48           | 156.1        | 200.7        | 48           | 252.8        | 174.2        | 177.3        | 187.2        | 342.8        | 157.5        | 273.4        | 143.4        | 161          |
| 30-mar      | 238.3                                | 96.8         | 160.6        | 72.6         | 109          | 66.2         | 74.7         | 174.1        | 266.3        | 333.6        | 241.1        | 139.4        | 225.2        | 153.4        | 209.8        | 109.7        | 166.2        | 128.3        |
| 7-Apr       | 189.6                                | 142.7        | 237.3        | 163.7        | 132.3        | 157.4        |              | 146.6        | 191          | 221.6        | 244          | 307.8        | 103.7        | 99.3         | 126.8        | 97.7         | 178.4        | 192.5        |
| 15-Apr      | 411.6                                | 402.7        | 121          | 201.4        | 273.1        | 246.7        | 369          | 257.8        | 322.9        | 219.7        | 162.9        | 224.1        | 165.1        | 286.8        | 180.8        | 212.5        | 26.1         | 148.1        |
| 23-Apr      | 115.4                                | 357.8        | 277.9        | 256          | 208.4        | 254.2        |              | 184.6        | 238.6        | 201.3        | 51.3         | 209.9        | 372.3        | 292.9        | 121.4        | 170.8        | 247.5        | 233.1        |
| 01-may      | 110.3                                | 317          | 266.6        | 111.2        | 160.2        | 268.8        |              | 126          | 375.4        | 374.1        | 236.3        | 284          | 369.7        | 167.9        | 171.5        | 131.5        | 250.6        | 156.7        |
| 09-may      | 321                                  | 200.2        | 260.9        | 147.4        | 284.7        | 222.2        | 336.6        | 331.1        | 243.4        | 254.4        | 299.5        | 307.5        | 284.6        | 248          | 241.3        | 170.5        | 117.4        | 79.6         |
| 17-may      | 481                                  | 352.4        | 311.5        | 273.1        | 139          | 310.5        | 255.5        | 266          | 309.9        | 309.9        | 277.4        | 351          | 72           | 237.7        | 312.1        | 425.8        | 132.6        | 51.1         |
| 25-may      | 450.5                                | 295.6        | 269          | 151          | 285.4        | 279.7        | 271.3        | 281.1        | 268.5        | 287.6        | 238.3        | 300.5        | 337.2        | 216.5        | 319.5        | 218.6        | 245.6        | 140.1        |
| 02-jun      | 232.4                                | 210.7        | 244.3        | 297.3        | 263.7        | 257          | 71.6         | 330.7        | 348.3        | 265.7        | 171.8        | 303.8        | 265.4        | 203.7        | 275.6        | 247.7        | 185.7        | 305.2        |
| 10-jun      | 392                                  | 280          | 263.7        | 289          | 254.7        | 281.1        | 360.3        | 279.7        | 312.3        | 315.6        | 264.3        | 266.3        | 258.2        | 223.7        | 236.8        | 259.3        | 216.5        | 272.4        |
| 18-jun      | 362.5                                |              | 237.9        | 303.1        | 246.5        | 253.2        | 278.6        | 174.8        | 326.4        | 236.4        | 147.2        | 285          | 263.6        | 231          | 258.2        | 287.1        | 227.6        | 243.4        |
| 26-jun      | 432.3                                | 73.2         | 250          | 262.7        | 104.2        | 245.2        | 282.8        | 281.9        | 357.2        | 316.7        | 255.7        | 301.8        | 269.7        | 295.3        | 222.2        | 298.9        | 232.2        | 267.6        |
| 04-jul      | 334.6                                | 220.6        | 204.3        | 236.2        | 160.3        | 252.3        | 281.9        | 255.9        | 306.8        | 291.1        | 249          | 296          | 314.2        | 251.5        | 227.5        | 282.9        | 198.7        | 218.8        |
| 12-jul      | 366.7                                | 253.2        | 270          | 306.5        | 233.4        | 263.9        | 290          | 236.8        | 307.2        | 282.6        | 129.1        | 263.6        | 305.4        | 264.2        | 253.8        | 311          | 246.4        | 283.7        |
| 20-jul      | 290                                  | 318          | 324.1        | 234          | 233.9        | 261.8        | 232.5        | 222.8        | 249.5        | 212.2        | 267.9        | 292.4        | 320.5        | 272.5        | 259          | 254.2        | 234.5        | 251.6        |
| 28-jul      | 297.1                                | 348.9        | 284.3        | 31.1         | 303.8        | 263.8        | 266.7        | 280.9        | 268.8        | 324.5        | 227          | 285.7        | 265.3        | 285.7        | 296.4        | 309.6        | 222.4        | 267.5        |
| 5-Aug       | 481.8                                | 292.8        | 293.3        | 258.5        | 279.8        | 177.7        | 205.6        | 221.2        | 159.7        | 249          | 234.1        | 276.6        | 307.7        | 249.6        | 152.1        | 250.3        | 196.7        | 243.7        |
| 13-Aug      | 323                                  | 255.2        | 119.3        | 290.3        | 252.2        | 245.6        | 106.7        | 252.1        | 258.7        | 308.4        | 203.2        | 246.6        | 258.7        | 268.9        | 282.2        | 265.4        | 179.3        | 231          |
| 21-Aug      | 264.1                                | 291.5        | 108.8        | 214.9        | 260.2        | 210.4        | 136.8        | 278.9        | 220.3        | 263.5        | 207.3        | 222          | 243.9        | 128.2        | 261.1        | 172.1        | 203.3        | 197.9        |
| 29-Aug      | 249.3                                | 310.3        | 253.8        | 212.1        | 174.5        | 178.9        | 236.7        | 163.3        | 259.1        | 168.9        | 57.6         | 233.4        | 210.8        | 295.3        | 214.7        | 252.5        | 150.1        | 176.7        |
| 06-sep      | 244.7                                | 162.8        | 231.4        | 220          | 192.9        | 111.5        | 259.8        | 81.7         | 195.6        | 313.5        | 242.2        | 130.7        | 283.9        | 247.3        | 116.4        | 148.9        | 170.7        | 50.3         |
| 14-sep      | 103.3                                | 155.3        | 144.3        | 220.9        | 319.7        | 231          | 235.6        | 196.7        | 125.6        | 213.6        | 211.5        | 116.3        | 218.6        | 201          | 223.9        | 218.5        | 143          | 232.1        |
| 22-sep      | 175.4                                | 135.8        | 218.6        | 274.7        | 195.6        | 206.9        | 209.1        | 138.7        | 198.2        | 100.7        | 105.9        | 88.7         | 42.4         | 169.7        | 142.9        | 56.7         | 37.1         | 150.9        |
| 30-sep      | 219.2                                | 263.5        | 73.9         | 216.2        | 73.5         | 25.6         | 202.8        | 238.3        | 90           | 113          | 183.7        | 105.7        | 209.8        | 74.5         | 144.6        | 199.6        | 73.5         | 195.4        |
| 08-oct      | 237.2                                | 105.8        | 148.3        | 205.1        | 254.7        | 263.5        | 273.1        | 302.2        | 137.3        | 108.8        | 115.3        | 263.4        | 119.2        | 63           | 39.3         | 208.7        | 220.1        | 153.1        |
| 16-oct      | 235.2                                | 185          | 137          | 168.2        | 70.6         | 70.1         | 286.3        | 187          | 263.6        | 52.4         | 154.7        | 221.8        | 22.4         | 141          | 118.4        | 81.3         | 146.5        | 67           |
| 24-oct      | 273.8                                | 78.6         | 41           | 119.2        | 144.6        | 195.7        | 218          | 114.2        | 72.4         | 283.7        | 116.2        | 57           | 106.5        | 140.6        | 195.6        | 103          | 129.7        | 140.6        |
| 01-nov      | 306.6                                | 341.9        | 310.5        | 224.2        | 51.3         | 141          | 179          | 289.5        | 102.4        | 295.2        | 184.9        | 139.4        | 114.6        | 281.6        | 70.4         | 229.5        | 152.6        | 200.9        |
| 09-nov      | 297.2                                | 147.3        | 118.9        | 211.9        | 262.3        | 243.3        | 83.1         | 199.9        | 138.5        | 227.8        | 90.1         | 127.7        | 172.8        | 147.3        | 144.9        | 91.8         | 194.5        | 170.6        |
| 17-nov      | 208.8                                | 104          | 36           | 247.6        | 337.5        | 291.3        | 185.3        | 108.4        | 116          | 160.5        | 372.3        | 54.7         | 194.2        | 279.5        | 304.5        | 231.1        | 199.3        | 201.8        |
| 25-nov      | 42.2                                 | 308.8        | 103.4        | 62.3         | 181.2        | 249.6        | 206.9        | 278.5        | 74.4         | 229          | 156.4        | 188.9        | 208.4        | 220.7        | 82.2         | 81.7         | 69.5         | 161.4        |
| 3-Dec       | 89                                   | 111.9        | 207.1        | 238.2        | 212.5        | 149.7        | 123.5        | 267.6        | 324.8        | 54.4         | 133.7        | 67.1         | 78.8         | 316.1        | 138.2        | 300.3        | 188          | 176.5        |
| 11-Dec      | 409.4                                | 303.7        | 151.3        | 63.2         | 179.7        | 39.7         | 107.7        | 73.5         | 298.1        | 200.7        | 134.9        | 139.6        | 184.1        | 215.4        | 192.4        | 130.7        | 163          | 175.7        |
| 19-Dec      | 99.4                                 | 264.4        | 259.3        | 131          | 354.4        | 158.7        | 85.2         | 171.4        | 252.1        | 167.7        | 116.8        | 347.2        | 168.6        | 271.3        | 214.2        | 86           | 123.5        | 192.4        |
| 27-Dec      | 197                                  | 297.3        | 117.7        | 126          | 41.9         | 294.5        | 176.7        | 157.1        | 229.8        | 289.4        | 228.7        | 196.3        | 160.7        | 112.7        | 175          | 244.4        | 135.8        | 187.1        |
| <b>Mean</b> | <b>295.7</b>                         | <b>237.1</b> | <b>194.5</b> | <b>199.7</b> | <b>193.9</b> | <b>206.6</b> | <b>205.0</b> | <b>202.1</b> | <b>227.6</b> | <b>226.3</b> | <b>182.5</b> | <b>222.3</b> | <b>216.5</b> | <b>202.9</b> | <b>189.7</b> | <b>201.2</b> | <b>170.2</b> | <b>184.3</b> |
| <b>Max.</b> | <b>649</b>                           | <b>402.7</b> | <b>324.1</b> | <b>517.5</b> | <b>354.4</b> | <b>331.4</b> | <b>442.3</b> | <b>331.1</b> | <b>406.9</b> | <b>376.9</b> | <b>372.3</b> | <b>398.7</b> | <b>422.6</b> | <b>342.8</b> | <b>319.5</b> | <b>425.8</b> | <b>250.6</b> | <b>311.6</b> |

**Table S3.** Values of the climatic variables of precipitation, temperature, SCA and discharge for the SRM from 2005 to 2009.

| Climate station      | Snow Cover Area    |         |         |          | Discharge—three station |         |         |          |
|----------------------|--------------------|---------|---------|----------|-------------------------|---------|---------|----------|
|                      | Correlation Method |         |         |          | Correlation Method      |         |         |          |
|                      | DCCA               | Pearson | Kendall | Spearman | DCCA                    | Pearson | Kendall | spearman |
| <b>Precipitation</b> |                    |         |         |          |                         |         |         |          |
| Recuay               | −0.71              | −0.32   | −0.32   | −0.44    | 0.57                    | 0.37    | 0.37    | 0.50     |
| Yungay               | −0.56              | −0.34   | −0.34   | −0.45    | 0.67                    | 0.48    | 0.47    | 0.61     |
| Yanamarey            | −0.04              | −0.33   | −0.27   | −0.37    | 0.86                    | 0.44    | 0.32    | 0.43     |
| Artesonraju_AP2      | −0.64              | −0.43   | −0.31   | −0.44    | 0.38                    | 0.47    | 0.43    | 0.61     |
| <b>Temperature</b>   |                    |         |         |          |                         |         |         |          |
| Recuay               | −0.67              | −0.33   | −0.23   | −0.34    | −0.19                   | 0.12    | 0.23    | 0.35     |
| Yungay               | 0.15               | 0.00    | −0.02   | −0.02    | 0.81                    | −0.10   | −0.01   | −0.01    |
| Yanamarey            | −0.09              | 0.18    | 0.13    | 0.20     | −0.81                   | −0.24   | −0.14   | −0.21    |
| Artesonraju_AP2      | −0.30              | −0.07   | −0.05   | −0.08    | −0.41                   | 0.12    | 0.19    | −0.76    |
| Discharge            | −0.07              | −0.32   | −0.28   | −0.42    |                         |         |         |          |

**Table S4.** Monthly average discharge under climate change scenario RCP 4.5.

| Months    | Actual | Simulated   |              |              |
|-----------|--------|-------------|--------------|--------------|
|           |        | RCP 4.5 -30 | RCP 4.5 - 50 | RCP 4.5 - 80 |
| January   | 139.8  | 152.4       | 151          | 139.8        |
| February  | 150.4  | 143.4       | 127.7        | 132.4        |
| March     | 338.7  | 370.1       | 367          | 356.3        |
| April     | 224.4  | 204.5       | 201.7        | 196.2        |
| May       | 74.3   | 44.6        | 45           | 44.7         |
| June      | 24.7   | 21.5        | 18.7         | 19.8         |
| July      | 27.1   | 37          | 38.6         | 37.3         |
| August    | 21.6   | 23.8        | 22.1         | 21.8         |
| September | 31     | 37.6        | 36.4         | 40.5         |
| October   | 51.6   | 69.7        | 67.4         | 64.6         |
| November  | 62.7   | 63.4        | 61.6         | 53.3         |
| December  | 78.6   | 80.5        | 78.7         | 79.4         |

**Table S5.** Monthly average discharge under climate change scenario RCP 8.5.

| Months    | Actual | Simulated    |              |              |
|-----------|--------|--------------|--------------|--------------|
|           |        | RCP 8.5 - 30 | RCP 8.5 - 50 | RCP 8.5 - 80 |
| January   | 139.8  | 102.1        | 144.1        | 196          |
| February  | 150.4  | 138.8        | 136.6        | 164.1        |
| March     | 338.7  | 337          | 332.5        | 338.5        |
| April     | 224.4  | 211.4        | 204.2        | 192          |
| May       | 74.3   | 66.5         | 63.8         | 63.6         |
| June      | 24.7   | 19.6         | 24.8         | 18.1         |
| July      | 27.1   | 35.2         | 30           | 27.5         |
| August    | 21.6   | 18.5         | 22           | 20.9         |
| September | 31     | 34.3         | 30.7         | 41.2         |
| October   | 51.6   | 65.8         | 52.4         | 53.1         |
| November  | 62.7   | 58           | 58.9         | 45.1         |
| December  | 78.6   | 86.6         | 65.2         | 65.0         |
